# Supplementary material for: A Systematic Review of Organic Versus Conventional Food Consumption: Is There a Measurable Benefit on Human Health?
Source: PubMed Central journal article supplement (PMC7019963; doi:10.3390/nu12010007), 2019-12-18
Supplement: nutrients-12-00007-s001.pdf [file nutrients-12-00007-s001.pdf]

## Supplementary Figure S1: Medline Search Strategy

### Search strategy

#### MEDLINE strategy (run - 30/1/19)

1. MH organic agriculture or food, organic or pesticide residues
2. AB organic\* or bio-dynamic\* or biodynamic\* or bio-organic\* or bioorganic\* or bioorganic\* or ecologically or naturally or biologically
3. TI organic\* or bio-dynamic\* or biodynamic\* or bio-organic\* or bioorganic\* or bioorganic\* or ecologically or naturally or biologically
4. S1 OR S2 OR S3
5. AB conventional\* or nonorganic\* or non-organic\*
6. TI conventional\* or nonorganic\* or non-organic\*
7. SU conventional\* or nonorganic\* or non-organic\*
8. S5 OR S6 OR S7
9. S4 AND S8
10. MH fruit or vegetables or meat or dairy products or eggs or whole grains or bread or crops, agricultural or meals or nuts or seeds or raw foods or flavonoids or polyphenols or carotenoids
11. AB fruit or vegetables or meat or dairy or eggs or "whole grain\*" or wholegrain\* or beef or produce or meals or diet or food or cereal\* or cruciform or grain or seed or seeds or nuts or nut or honey or crop or crops or granary or wholewheat or legume\* or herbs or spices or juice\* or beverage\* or dairies or poultry or pork or milk or flavonoid\* or polyphenol\* or carotenoid\*
12. TI fruit or vegetables or meat or dairy or eggs or "whole grain\*" or wholegrain\* or beef or produce or meals or diet or food or cereal\* or cruciform or grain or seed or seeds or nuts or nut or honey or crop or crops or granary or wholewheat or legume\* or herbs or spices or juice\* or beverage\* or dairies or poultry or pork or milk or flavonoids or polyphenols or carotenoids
13. S10 OR S11 OR S12
14. AB produce\* or raise or raising or grown\* or cultivate\* or raised or farm\* or production
15. TI produce\* or raise or raising or grown\* or cultivate\* or raised or farm\* or production
16. SU produce\* or raise or raising or grown\* or cultivate\* or raised or farm\* or production
17. S14 OR S15 OR S16
18. S9 AND S13 AND S17
19. "health food"
20. PT comparative study
21. S9 OR S18 OR S19
22. S20 AND S21
23. S9 AND S13
24. S9 AND S17
25. S22 OR S23 OR S24
26. MH respiratory tract diseases OR arthritis OR asthma or eczema or reproductive health or lactation or breast feeding or semen or cardiovascular disease or osteoporosis or neoplasms or chronic disease or health or disease
27. AB respiratory or allerg\* or asthma or eczema or lactat\* or "breast milk" or "reproductive health" or semen or fertility or "quality of life" or arthritis or "irritable bowel" or "nutritional status" or "breast feeding" or breastfeeding or "weight loss" or "weight gain" or "body composition" or diabetes or cardiovascular or osteoporosis or "bone density" or neoplasm\* or cancer or health or disease or autoimmune or urine or "urinary excretion" or blood
28. TI respiratory or allerg\* or asthma or eczema or lactat\* or "breast milk" or "reproductive health" or semen or fertility or "quality of life" or arthritis or "irritable bowel" or "nutritional status" or "breast feeding" or breastfeeding or "weight loss" or "weight gain" or "body composition" or diabetes or cardiovascular or osteoporosis or "bone density" or neoplasm\* or cancer or health or disease or autoimmune or urine or "urinary excretion" or blood
29. S26 OR S27 OR S28
30. S25 AND S29

**Results = 1634**

**Key: AB abstract; MH MeSH heading; PT publication type; SU subject; TI title**

## Supplementary Figure S2: Risk of bias assessments

### 1. Clinical trial ROB - Cochrane Collaboration's tool for assessing risk of bias in randomised trials [1]

|                                        |       |       |       |       |       |       |       |       |       |       |       |       |       |       |       |       |       |       |       |
|----------------------------------------|-------|-------|-------|-------|-------|-------|-------|-------|-------|-------|-------|-------|-------|-------|-------|-------|-------|-------|-------|
| Random sequence generation             | Green | Grey  | Grey  | Grey  | Grey  | Grey  | Grey  | Grey  | Grey  | Red   | Red   | Red   | Red   | Red   | Red   | Red   | Red   | Red   | Red   |
| Allocation concealment                 | Green | Grey  | Grey  | Grey  | Grey  | Grey  | Grey  | Grey  | Grey  | Red   | Red   | Red   | Red   | Red   | Red   | Red   | Red   | Red   | Red   |
| Blinding of participants and personnel | Green | Grey  | Grey  | Grey  | Grey  | Grey  | Grey  | Grey  | Grey  | Red   | Red   | Red   | Red   | Red   | Red   | Red   | Red   | Red   | Red   |
| Blinding of outcome assessment         | Green | Grey  | Grey  | Grey  | Grey  | Grey  | Grey  | Grey  | Red   | Red   | Red   | Red   | Red   | Red   | Red   | Red   | Red   | Red   | Red   |
| Incomplete outcome data                | Green | Green | Green | Green | Green | Green | Green | Green | Green | Green | Green | Green | Green | Green | Green | Green | Green | Green | Green |
| Selective reporting                    | Green | Green | Green | Green | Green | Green | Green | Green | Green | Green | Green | Green | Green | Green | Green | Green | Green | Green | Green |
| Other bias                             |       |       |       |       |       |       |       |       |       |       |       |       |       |       |       |       |       |       | Red   |

Key: green = low risk of bias; grey = unclear risk of bias; red = high risk of bias

|                         | Random sequence generation | Allocation concealment | Blinding of participants and personnel | Blinding of outcome assessment | Incomplete outcome data | Selective reporting | Other bias |
|-------------------------|----------------------------|------------------------|----------------------------------------|--------------------------------|-------------------------|---------------------|------------|
| Caris-Veyrant (2004)    | ?                          | ?                      | ?                                      | -                              | +                       | +                   |            |
| Stracke (2009)          | ?                          | ?                      | ?                                      | ?                              | +                       | +                   |            |
| Stracke (2010)          | ?                          | ?                      | ?                                      | ?                              | +                       | +                   |            |
| Briviba (2007)          | ?                          | ?                      | ?                                      | ?                              | +                       | +                   |            |
| Grinder-Pedersen (2003) | ?                          | ?                      | ?                                      | ?                              | +                       | +                   |            |
| Ackay (2004)            | -                          | -                      | -                                      | -                              | -                       | -                   |            |
| Lu (2006)               | -                          | -                      | -                                      | -                              | +                       | +                   |            |
| Lu (2008)               | -                          | -                      | -                                      | -                              | +                       | +                   |            |
| Di Renzo (2007)         | -                          | -                      | -                                      | -                              | ?                       | -                   |            |
| De Lorenzo (2010)       | -                          | -                      | -                                      | -                              | +                       | +                   |            |
| Soltoft (2011)          | +                          | +                      | +                                      | ?                              | +                       | +                   |            |
| Tolado (2016)           | ?                          | -                      | -                                      | -                              | +                       | +                   |            |
| Goen (2017)             | -                          | -                      | -                                      | -                              | +                       | +                   | -          |
| Bradman (2015)          | -                          | -                      | -                                      | +                              | +                       | +                   |            |
| Oates (2014)            | ?                          | ?                      | ?                                      | -                              | +                       | +                   |            |

## 2. Cohort studies ROB – Newcastle Ottawa Quality Assessment Form for Cohort Studies [2]

|                                              | Brantsaeter 2016 | Torjusen 2016 | Christensen 2013 | Kummeling 2008 | Kesse-Guyot 2017 | Stenius 2011 | Buscaill 2015 | Bradbury 2015 | Baudry 2018 (x3) | Chiu 2018 |
|----------------------------------------------|------------------|---------------|------------------|----------------|------------------|--------------|---------------|---------------|------------------|-----------|
| <b>Selection</b>                             |                  |               |                  |                |                  |              |               |               |                  |           |
| Representative of the exposed cohort         | X                | X             | X                | X              | X                | X            | X             | X             | X                | X         |
| Selection of the non-exposed cohort          | X                | X             | X                |                | X                | X            | X             | X             | X                | X         |
| Ascertainment of exposure                    | X                | X             |                  |                |                  |              |               |               |                  |           |
| Outcome of interest not present at beginning | X                | X             |                  | X              |                  | X            | X             | X             |                  | X         |
| <b>Comparability</b>                         |                  |               |                  |                |                  |              |               |               |                  |           |
| Comparability of cohorts                     | X                | X             | X                | X              | XX               | X            | X             | X             | XX               | X         |
| <b>Outcome</b>                               |                  |               |                  |                |                  |              |               |               |                  |           |
| Assessment of outcome                        | X                | X             | X                | X              |                  | X            |               | X             | X                | X         |
| Adequate follow-up length                    | X                | X             | X                | X              | X                | X            | X             | X             | X                | X         |
| Adequate subjects retained to follow-up      | X                | X             | X                | X              |                  | X            | X             | X             | X                | X         |
| <b>Rating</b>                                | <b>8</b>         | <b>8</b>      | <b>6</b>         | <b>6</b>       | <b>5</b>         | <b>7</b>     | <b>6</b>      | <b>7</b>      | <b>7</b>         | <b>7</b>  |

### **Thresholds for converting the Newcastle-Ottawa scales to AHRQ standards (good, fair, and poor):**

**Good quality:** 3 or 4 stars in selection domain AND 1 or 2 stars in comparability domain AND 2 or 3 stars in outcome/exposure domain

**Fair quality:** 2 stars in selection domain AND 1 or 2 stars in comparability domain AND 2 or 3 stars in outcome/exposure domain

**Poor quality:** 0 or 1 star in selection domain OR 0 stars in comparability domain OR 0 or 1 stars in outcome/exposure domain

### 3. Cross-section ROB - Specialist Unit for Review Evidence (SURE) for Cross-sectional Studies [3]

|                                              | Rist 2007 | Mueller 2010 | Juhler 1999 | McGuire 2016 | Curl 2003 | Curl 2015 | Baudry 2017 | Jensen 1996 |
|----------------------------------------------|-----------|--------------|-------------|--------------|-----------|-----------|-------------|-------------|
| Design clearly stated                        | ✓         | ✓            | ✓           | ✓            | ✓         | ✓         | ✓           | ✓           |
| Clear study question                         | ✓         | ✓            | ✓           | ✓            | ✓         | ✓         | ✓           | ✓           |
| Setting, location, dates provided            | ✓         | ✓            | ✓           | ✓            | ✓         | ✓         | ✓           | X           |
| Participants fairly selected                 | ✓         | ✓            | ✓           | ✓            | X         | ✓         | ✓           | X           |
| Participant characteristics provided         | ✓         | ✓            | ✓           | ✓            | ✓         | ✓         | ✓           | X           |
| Appropriate measures used                    | ✓         | ✓            | ✓           | ✓            | ✓         | ✓         | ✓           | ✓           |
| Description of study size                    | ✓         | X            | ✓           | ✓            | ✓         | ✓         | ✓           | ✓           |
| Statistical methods well described           | ✓         | ✓            | ✓           | ✓            | ✓         | ✓         | ✓           | X           |
| Participant eligibility information provided | ✓         | ✓            | ✓           | ✓            | ✓         | ✓         | ✓           | X           |
| Results well described                       | ✓         | ✓            | ✓           | ✓            | ✓         | ✓         | ✓           | X           |
| Sponsorship/conflict of interest detailed    | ✓         | ✓            | ✓           | ✓            | ✓         | ✓         | ✓           | ✓           |
| Limitations identified                       | ✓         | X            | ✓           | ✓            | ✓         | ✓         | ✓           | ✓           |

#### References

- Higgins, J.P.T.; Altman, D.G.; Gøtzsche, P.C.; Jüni, P.; Moher, D.; Oxman, A.D.; Savović, J.; Schulz, K.F.; Weeks, L.; Sterne, J.A.C. The Cochrane Collaboration's tool for assessing risk of bias in randomised trials. *BMJ* **2011**, *343*.
- Wells, G.; Shea, B.; O'Connell, D.; Peterson, J.; Welch, V.; Losos, M.; Tugwell, P. The Newcastle-Ottawa Scale (NOS) for assessing the quality of nonrandomised studies in meta-analyses. Available online: [http://www.ohri.ca/programs/clinical\\_epidemiology/oxford.asp](http://www.ohri.ca/programs/clinical_epidemiology/oxford.asp) (accessed on 22nd March 2019).
- Specialist Unit for Review Evidence (SURE). Questions to assist with the critical appraisal of cross-sectional studies. Available online: <https://www.cardiff.ac.uk/specialist-unit-for-review-evidence/resources/critical-appraisal-checklists> (accessed on 23rd Jan 2019).
